# Supplementary material for: Octahedral tilting in Prussian blue analogues
Source: Royal Society of Chemistry journal article supplement (doi:10.1039/d2tc00848c), 2022-01-01
Supplement: d2tc00848c1.csv [file d2tc00848c1.csv]

A	B	B'	x	y	tilted	doi
NaN	Fe	Co	0.000	0.065	No	﻿10.1021/ja044959o
NaN	V	Cr	0.000	0.340	No	﻿10.1021/ja990946c
NaN	Co	Fe	0.000	0.080	No	﻿10.7567/JJAP.53.067101
NaN	Co	Fe	0.000	0.100	No	﻿10.1155/2013/967285
NaN	Co	Fe	0.000	0.100	No	﻿10.7567/JJAP.52.044301
NaN	Co	Fe	0.000	0.100	No	﻿10.1155/2013/967285
NaN	Co	Fe	0.000	0.340	No	﻿10.1021/acs.inorgchem.0c01432
NaN	Cu	Fe	0.000	0.320	No	10.1016/0039-9140(95)01611-2
NaN	Cu	Fe	0.000	0.370	No	﻿10.1038/s41560-018-0309-7
NaN	Cu	Fe	0.000	0.410	No	﻿10.1098/rsos.201779
NaN	Cu	Fe	0.000	0.440	No	﻿10.3390/ma12203371
NaN	Cu	Fe	0.000	0.500	No	﻿10.1039/c8ra06377j
NaN	Fe	Fe	0.000	0.050	No	﻿10.1002/advs.201600044
NaN	Fe	Fe	0.000	0.060	No	﻿10.1039/c3ee44004d
NaN	Fe	Fe	0.000	0.060	No	﻿10.1021/acsami.6b06880
NaN	Fe	Fe	0.000	0.250	No	﻿10.1021/jp3111327
NaN	Mn	Fe	0.000	0.130	No	﻿10.7567/JJAP.52.017301
NaN	Mn	Fe	0.000	0.170	No	﻿10.7567/JJAP.52.017301
NaN	Mn	Fe	0.000	0.170	No	﻿10.1155/2013/967285
NaN	Mn	Fe	0.000	0.170	No	﻿10.1155/2013/967285
NaN	MnCo	Fe	0.000	0.090	No	﻿10.7567/JJAP.53.067101
NaN	MnCo	Fe	0.000	0.100	No	﻿10.1039/d1cc05727h
NaN	Ni	Fe	0.000	0.325	No	﻿10.1021/jp403337w
NaN	Ni	Fe	0.000	0.400	No	﻿10.1021/acsami.9b20320
NaN	Mn	Mn	0.000	0.010	No	﻿10.1038/ncomms6280
NaN	Mn	Mn	0.000	0.070	No	﻿10.1021/jp2118949
NaN	Cd	Pt	0.000	0.000	No	﻿10.1021/ja060916r
NaN	Co	Pt	0.000	0.000	No	﻿10.1021/ja060916r
NaN	Cu	Pt	0.000	0.000	No	﻿10.1021/ja060916r
NaN	Fe	Pt	0.000	0.000	No	﻿10.1021/ja060916r
NaN	Mn	Pt	0.000	0.000	No	﻿10.1021/ja060916r
NaN	Ni	Pt	0.000	0.000	No	﻿10.1021/ja060916r
NaN	Zn	Pt	0.000	0.000	No	﻿10.1021/ja060916r
Li	Co	Fe	0.370	0.080	No	﻿10.7567/JJAP.53.067101
Li	Co	Fe	0.740	0.080	No	﻿10.7567/JJAP.53.067101
Li	Co	Fe	1.480	0.080	No	﻿10.7567/JJAP.53.067101
Li	Co	Fe	1.680	0.080	Yes	﻿10.7567/JJAP.53.067101
Li	Co	Fe	0.400	0.100	No	﻿10.1155/2013/967285
Li	Co	Fe	0.400	0.100	No	﻿10.7567/JJAP.52.044301
Li	Co	Fe	1.000	0.100	No	﻿10.1155/2013/967285
Li	Co	Fe	1.000	0.100	No	﻿10.7567/JJAP.52.044301
Li	Co	Fe	1.200	0.100	No	﻿10.7567/JJAP.52.044301
Li	Co	Fe	1.600	0.100	No	﻿10.1155/2013/967285
Li	Co	Fe	1.600	0.100	No	﻿10.7567/JJAP.52.044301
Li	Mn	Fe	0.790	0.070	No	﻿10.7567/JJAP.52.017301
Li	Mn	Fe	0.960	0.070	No	﻿10.7567/JJAP.52.017301
Li	Mn	Fe	1.340	0.070	No	﻿10.7567/JJAP.52.017301
Li	Mn	Fe	1.720	0.070	No	﻿10.7567/JJAP.52.017301
Li	Mn	Fe	0.610	0.130	No	﻿10.7567/JJAP.52.017301
Li	Mn	Fe	1.180	0.130	No	﻿10.7567/JJAP.52.017301
Li	Mn	Fe	1.480	0.130	No	﻿10.7567/JJAP.52.017301
Li	Mn	Fe	0.260	0.170	No	﻿10.7567/JJAP.52.017301
Li	Mn	Fe	0.260	0.170	No	﻿10.1155/2013/967285
Li	Mn	Fe	0.460	0.170	No	﻿10.7567/JJAP.52.017301
Li	Mn	Fe	0.460	0.170	No	﻿10.1155/2013/967285
Li	Mn	Fe	0.760	0.170	No	﻿10.7567/JJAP.52.017301
Li	Mn	Fe	0.760	0.170	No	﻿10.1155/2013/967285
Li	Mn	Fe	1.000	0.170	No	﻿10.7567/JJAP.52.017301
Li	Mn	Fe	1.000	0.170	No	﻿10.1155/2013/967285
Li	Mn	Fe	1.320	0.170	No	﻿10.7567/JJAP.52.017301
Li	Mn	Fe	1.320	0.170	No	﻿10.1155/2013/967285
Li	Mn	Fe	0.520	0.190	No	10.1143/APEX.5.041801
Li	Mn	Fe	1.220	0.190	No	10.1143/APEX.5.041801
Li	MnCo	Fe	0.360	0.090	No	﻿10.7567/JJAP.53.067101
Li	MnCo	Fe	0.720	0.090	No	﻿10.7567/JJAP.53.067101
Li	MnCo	Fe	1.080	0.090	No	﻿10.7567/JJAP.53.067101
Li	MnCo	Fe	1.640	0.090	No	﻿10.7567/JJAP.53.067101
Li	MnCo	Fe	0.340	0.110	No	﻿10.7567/JJAP.53.067101
Li	MnCo	Fe	0.860	0.110	No	﻿10.7567/JJAP.53.067101
Li	MnCo	Fe	1.200	0.110	No	﻿10.7567/JJAP.53.067101
Li	MnCo	Fe	1.560	0.110	No	﻿10.7567/JJAP.53.067101
LiNa	Cd	Fe	0.980	0.040	No	10.1143/APEX.5.041801
LiNa	Cd	Fe	1.400	0.040	No	10.1143/APEX.5.041801
LiNa	Co	Fe	0.200	0.290	No	10.1143/APEX.5.041801
LiNa	Co	Fe	0.200	0.290	No	﻿10.1155/2013/967285
LiNa	Co	Fe	0.720	0.290	No	10.1143/APEX.5.041801
LiNa	Co	Fe	0.720	0.290	No	﻿10.1155/2013/967285
LiNa	Ni	Fe	0.090	0.320	No	﻿10.1155/2013/967285
LiNa	Ni	Fe	0.320	0.320	No	10.1143/APEX.5.041801
LiNa	Ni	Fe	0.320	0.320	No	﻿10.1155/2013/967285
LiNa	Ni	Fe	0.540	0.320	No	10.1143/APEX.5.041801
LiNa	Ni	Fe	0.900	0.320	No	10.1143/APEX.5.041801
LiK	Cu	Fe	0.248	0.301	No	﻿10.1002/anie.201102048
LiK	Cu	Fe	0.488	0.301	No	﻿10.1002/anie.201102048
LiK	Cu	Fe	0.548	0.301	No	﻿10.1002/anie.201102048
LiK	Cu	Fe	1.378	0.301	No	﻿10.1002/anie.201102048
LiK	Cu	Fe	1.438	0.301	No	﻿10.1002/anie.201102048
LiK	Mn	Fe	0.358	0.301	No	﻿10.1021/jz100708b
LiK	Mn	Fe	0.418	0.301	No	﻿10.1021/jz100708b
LiK	Mn	Fe	0.678	0.301	No	﻿10.1021/jz100708b
LiK	Mn	Fe	0.738	0.301	No	﻿10.1021/jz100708b
LiK	Mn	Fe	0.998	0.301	No	﻿10.1021/jz100708b
Na	Cd	Fe	1.960	0.010	Yes	10.7566/JPSJ.90.013601
Na	Cd	Fe	1.840	0.040	No	10.1143/APEX.5.041801
Na	Cd	Fe	1.840	0.040	No	﻿10.1155/2013/967285
Na	Co	Fe	1.850	0.010	Yes	﻿10.1002/cnma.201500021
Na	Co	Fe	1.850	0.010	Yes	﻿10.1021/acsami.5b12620
Na	Co	Fe	1.870	0.020	Yes	﻿10.1002/asia.201701715
Na	Co	Fe	1.680	0.080	Yes	﻿10.7567/JJAP.53.067101
Na	Co	Fe	1.540	0.090	No	﻿10.1039/d0cp05665k
Na	Co	Fe	0.700	0.100	No	﻿10.1155/2013/967285
Na	Co	Fe	1.200	0.100	No	﻿10.1155/2013/967285
Na	Co	Fe	1.400	0.100	No	10.1143/JPSJ.78.074602
Na	Co	Fe	1.400	0.100	No	﻿10.1155/2013/967285
Na	Co	Fe	1.440	0.100	No	10.1143/JPSJ.78.074602
Na	Co	Fe	1.470	0.100	Yes	﻿10.1002/asia.201701715
Na	Co	Fe	1.600	0.100	Yes	﻿10.1039/c8dt04338h
Na	Co	Fe	1.600	0.100	No	10.1063/1.4979888
Na	Co	Fe	1.600	0.100	Yes	10.1143/JPSJ.78.074602
Na	Co	Fe	1.600	0.100	No	﻿10.1155/2013/967285
Na	Co	Fe	1.600	0.100	Yes	﻿10.1038/s41598-021-83699-8
Na	Co	Fe	1.520	0.120	No	﻿10.1039/c4cc04564e
Na	Co	Fe	1.790	0.130	Yes	﻿10.1002/asia.201701715
Na	Co	Fe	0.817	0.130	No	﻿10.1021/ic010915u
Na	Co	Fe	1.540	0.140	Yes	﻿10.1039/c5ta10571d
Na	Co	Fe	1.400	0.150	Yes	﻿10.1038/s41598-017-13719-z
Na	Co	Fe	0.497	0.179	No	﻿10.1021/ja102660b
Na	Co	Fe	1.240	0.190	No	﻿10.1038/s41598-021-83699-8
Na	Co	Fe	0.476	0.206	No	﻿10.1021/ic010915u
Na	Co	Fe	0.310	0.240	No	﻿10.1021/ja9012672
Na	Co	Fe	0.402	0.242	No	﻿10.1021/ic010915u
Na	Co	Fe	0.320	0.260	No	﻿10.1021/jp044739x
Na	Co	Fe	0.860	0.270	No	﻿10.1002/aenm.201702856
Na	Co	Fe	0.270	0.270	No	﻿10.1021/ic010915u
Na	Co	Fe	0.840	0.290	No	10.1063/1.4979888
Na	Co	Fe	0.840	0.290	No	10.1143/APEX.5.041801
Na	Co	Fe	0.840	0.290	No	﻿10.1155/2013/967285
Na	Co	Fe	0.840	0.290	No	﻿10.1038/s41598-021-83699-8
Na	Co	Fe	0.047	0.333	No	﻿10.1021/ic010915u
Na	CoNi	Fe	1.810	0.040	Yes	﻿10.1002/cey2.142
Na	CoNi	Fe	1.710	0.060	Yes	﻿10.1039/d0cp05665k
Na	CoNi	Fe	1.480	0.130	Yes	﻿10.1038/s41598-017-13719-z
Na	CoNi	Fe	1.440	0.140	Yes	﻿10.1038/s41598-017-13719-z
Na	CoNi	Fe	0.310	0.230	No	﻿10.1021/ja9012672
Na	CoNi	Fe	0.340	0.240	No	﻿10.1021/ja9012672
Na	CoNi	Fe	0.330	0.250	No	﻿10.1021/ja9012672
Na	CoNi	Fe	0.270	0.270	No	﻿10.1021/ja9012672
Na	Cu	Fe	0.700	0.310	No	﻿10.3390/ma12203371
Na	Cu	Fe	0.089	0.363	No	10.1016/0039-9140(95)01611-2
Na	Cu	Fe	0.088	0.412	No	10.1016/0039-9140(95)01611-2
Na	Fe	Fe	0.030	0.000	No	﻿10.1039/D0DT00014K
Na	Fe	Fe	0.490	0.000	No	﻿10.1039/D0DT00014K
Na	Fe	Fe	0.980	0.000	No	﻿10.1039/D0DT00014K
Na	Fe	Fe	1.540	0.000	Yes	﻿10.1039/D0DT00014K
Na	Fe	Fe	1.810	0.000	Yes	10.1021/acs.chemmater.9b01494
Na	Fe	Fe	1.880	0.000	Yes	10.1021/acs.chemmater.9b01494
Na	Fe	Fe	2.000	0.000	Yes	﻿10.1149/2.0701706jes
Na	Fe	Fe	1.000	0.040	No	﻿10.1039/d0se00120a
Na	Fe	Fe	1.030	0.040	Yes	﻿10.1039/c9nj06024c
Na	Fe	Fe	1.800	0.050	Yes	10.1021/acsami.0c22032
Na	Fe	Fe	0.140	0.060	No	﻿10.1039/c3ee44004d
Na	Fe	Fe	0.480	0.060	No	﻿10.1039/c3ee44004d
Na	Fe	Fe	0.610	0.060	No	﻿10.1039/c3ee44004d
Na	Fe	Fe	1.180	0.060	Yes	﻿10.1039/c3ee44004d
Na	Fe	Fe	1.900	0.060	Yes	﻿10.1039/c3ee44004d
Na	Fe	Fe	2.000	0.060	Yes	﻿10.1039/c3ee44004d
Na	Fe	Fe	1.290	0.090	No	﻿10.1039/c6ra21500a
Na	Fe	Fe	1.950	0.120	No	﻿10.1007/s40820-021-00742-z
Na	Fe	Fe	1.490	0.140	Yes	﻿10.1039/d0qi01361g
Na	Fe	Fe	1.530	0.140	No	﻿10.1007/s40820-021-00742-z
Na	Fe	Fe	1.330	0.170	Yes	﻿10.1039/d0qi01361g
Na	Fe	Fe	0.300	0.180	No	10.1021/acs.inorgchem.9b03699
Na	Fe	Fe	0.710	0.180	No	﻿10.1039/d0se00120a
Na	Fe	Fe	1.520	0.190	Yes	﻿10.1021/acsami.1c23793
Na	Fe	Fe	1.660	0.190	No	﻿10.1007/s40820-021-00742-z
Na	Fe	Fe	1.310	0.220	No	﻿10.1039/d0qi01361g
Na	Fe	Fe	1.120	0.240	No	﻿10.1039/c8ta02291g
Na	Fe	Fe	0.150	0.250	No	﻿10.1021/acsami.0c20067
Na	Fe	Fe	0.500	0.250	No	﻿10.1021/acsami.0c20067
Na	Fe	Fe	0.775	0.250	No	﻿10.1002/adfm.201806405
Na	Fe	Fe	0.130	0.320	No	﻿10.1039/c3ee44004d
Na	FeCoNi	Fe	1.850	0.030	Yes	﻿10.1002/cey2.142
Na	FeCu	Fe	1.680	0.140	Yes	﻿10.1021/acsami.1c23793
Na	FeNi	Fe	1.800	0.070	Yes	﻿10.1002/cey2.142
Na	FeNi	Fe	0.950	0.220	No	﻿10.1039/c8ta02291g
Na	FeNi	Fe	1.040	0.240	No	﻿10.1039/c8ta02291g
Na	Ga	Fe	0.980	0.010	No	10.1021/acs.inorgchem.8b02428
Na	Mn	Fe	1.899	0.005	Yes	10.1016/j.jallcom.2017.09.146
Na	Mn	Fe	1.800	0.010	No	﻿10.1039/c4cc05830e
Na	Mn	Fe	1.890	0.030	Yes	10.1021/ja512383b
Na	Mn	Fe	1.860	0.050	Yes	﻿10.1021/acs.cgd.0c01409
Na	Mn	Fe	1.720	0.070	Yes	﻿10.1039/c8dt04338h
Na	Mn	Fe	1.720	0.070	Yes	﻿10.7567/JJAP.53.067101
Na	Mn	Fe	1.720	0.070	Yes	﻿10.1143/JPSJ.80.103601
Na	Mn	Fe	1.720	0.070	Yes	﻿10.1155/2013/967285
Na	Mn	Fe	1.900	0.070	Yes	﻿10.1002/adfm.201908754
Na	Mn	Fe	2.360	0.070	Yes	﻿10.1002/adfm.201908754
Na	Mn	Fe	1.380	0.080	No	﻿10.1002/adfm.201908754
Na	Mn	Fe	1.388	0.087	No	10.1016/j.jallcom.2017.09.146
Na	Mn	Fe	1.727	0.091	Yes	10.1021/acsaem.0c00669
Na	Mn	Fe	1.727	0.091	Yes	﻿10.1002/smtd.201900529
Na	Mn	Fe	1.600	0.100	Yes	﻿10.1143/JPSJ.80.103601
Na	Mn	Fe	1.520	0.120	Yes	﻿10.1038/s41598-017-13719-z
Na	Mn	Fe	1.480	0.130	Yes	﻿10.1143/JPSJ.80.103601
Na	Mn	Fe	1.480	0.130	Yes	﻿10.1155/2013/967285
Na	Mn	Fe	1.500	0.130	Yes	﻿10.1021/acs.cgd.0c01409
Na	Mn	Fe	1.440	0.140	Yes	﻿10.1016/j.electacta.2016.05.205
Na	Mn	Fe	1.400	0.150	Yes	﻿10.1143/JPSJ.80.103601
Na	Mn	Fe	1.340	0.160	Yes	﻿10.1021/acs.cgd.0c01409
Na	Mn	Fe	1.360	0.160	Yes	﻿10.7567/JJAP.55.067101
Na	Mn	Fe	1.640	0.160	Yes	﻿10.1021/acs.cgd.0c01409
Na	Mn	Fe	0.080	0.170	No	﻿10.1155/2013/967285
Na	Mn	Fe	0.320	0.170	No	﻿10.1155/2013/967285
Na	Mn	Fe	0.500	0.170	No	﻿10.1155/2013/967285
Na	Mn	Fe	0.800	0.170	No	﻿10.1155/2013/967285
Na	Mn	Fe	0.990	0.170	No	﻿10.1155/2013/967285
Na	Mn	Fe	1.320	0.170	No	10.1143/JPSJ.80.074608
Na	Mn	Fe	1.320	0.170	No	﻿10.1155/2013/967285
Na	Mn	Fe	1.320	0.170	No	﻿10.1016/j.electacta.2016.03.131
Na	Mn	Fe	1.320	0.170	Yes	﻿10.1016/j.electacta.2016.03.131
Na	Mn	Fe	1.240	0.190	No	﻿10.1143/JPSJ.80.103601
Na	Mn	Fe	1.240	0.190	No	10.1143/APEX.5.041801
Na	Mn	Fe	1.330	0.210	Yes	﻿10.1039/c5ta10571d
Na	Mn	Fe	1.100	0.230	Yes	﻿10.1021/acs.cgd.0c01409
Na	Mn	Fe	0.970	0.280	No	﻿10.1021/acs.cgd.0c01409
Na	MnCo	Fe	1.880	0.030	Yes	﻿10.1016/j.electacta.2016.05.205
Na	MnCo	Fe	1.680	0.080	Yes	﻿10.1039/c8dt04338h
Na	MnCo	Fe	1.680	0.080	Yes	﻿10.7567/JJAP.53.067101
Na	MnCo	Fe	1.700	0.080	Yes	﻿10.1039/c5ta10571d
Na	MnCo	Fe	1.760	0.080	Yes	﻿10.1039/c5ta10571d
Na	MnCo	Fe	1.640	0.090	Yes	﻿10.1039/c8dt04338h
Na	MnCo	Fe	1.640	0.090	Yes	﻿10.7567/JJAP.53.067101
Na	MnCo	Fe	0.190	0.100	No	﻿10.1039/d1cc05727h
Na	MnCo	Fe	0.370	0.100	No	﻿10.1039/d1cc05727h
Na	MnCo	Fe	0.560	0.100	No	﻿10.1039/d1cc05727h
Na	MnCo	Fe	0.750	0.100	No	﻿10.1039/d1cc05727h
Na	MnCo	Fe	0.950	0.100	No	﻿10.1039/d1cc05727h
Na	MnCo	Fe	1.170	0.100	No	﻿10.1039/d1cc05727h
Na	MnCo	Fe	1.530	0.100	Yes	﻿10.1039/c5ta10571d
Na	MnCo	Fe	1.600	0.100	Yes	﻿10.1039/c8dt04338h
Na	MnCo	Fe	1.600	0.100	Yes	﻿10.1039/d1cc05727h
Na	MnCo	Fe	1.600	0.100	Yes	﻿10.7567/JJAP.53.067101
Na	MnCo	Fe	1.560	0.110	Yes	﻿10.1039/c8dt04338h
Na	MnCo	Fe	1.560	0.110	Yes	﻿10.7567/JJAP.53.067101
Na	MnCo	Fe	1.560	0.110	Yes	﻿10.1038/s41598-017-13719-z
Na	MnCo	Fe	1.400	0.150	Yes	﻿10.1038/s41598-017-13719-z
Na	MnFe	Fe	1.440	0.140	No	﻿10.1016/j.electacta.2016.05.205
Na	MnNi	Fe	1.760	0.020	Yes	﻿10.1039/c4cc05830e
Na	MnNi	Fe	1.640	0.090	Yes	﻿10.1016/j.electacta.2016.05.205
Na	MnNi	Fe	1.640	0.090	Yes	﻿10.1038/s41598-017-13719-z
Na	MnNi	Fe	1.600	0.100	Yes	﻿10.1038/s41598-017-13719-z
Na	Ni	Fe	1.860	0.040	Yes	﻿10.1039/c4cc05830e
Na	Ni	Fe	1.550	0.070	Yes	10.1021/acsami.0c08084
Na	Ni	Fe	1.780	0.070	No	﻿10.1002/cey2.142
Na	Ni	Fe	1.820	0.100	No	﻿10.1039/d0qi00872a
Na	Ni	Fe	1.480	0.110	Yes	﻿10.1002/aenm.201803158
Na	Ni	Fe	1.520	0.120	Yes	﻿10.1038/s41598-017-13719-z
Na	Ni	Fe	1.860	0.120	Yes	10.1016/j.electacta.2018.11.063
Na	Ni	Fe	1.670	0.130	Yes	﻿10.1039/d0ra03490h
Na	Ni	Fe	1.200	0.150	Yes	10.1021/acsami.0c08084
Na	Ni	Fe	1.220	0.160	Yes	﻿10.1002/aenm.201803158
Na	Ni	Fe	1.460	0.170	Yes	10.1021/acsami.6b11070
Na	Ni	Fe	0.270	0.250	No	﻿10.1021/ja9012672
Na	Ni	Fe	0.790	0.260	No	﻿10.1002/aenm.201702856
Na	Ni	Fe	0.790	0.260	No	﻿10.1039/d0ra03490h
Na	Ni	Fe	0.680	0.280	No	﻿10.1002/aenm.201803158
Na	Ni	Fe	0.240	0.290	No	﻿10.1039/c3ta13223d
Na	Ni	Fe	0.049	0.301	No	﻿10.1039/d0cc04628k
Na	Ni	Fe	0.043	0.304	No	﻿10.1039/d0cc04628k
Na	Ni	Fe	0.720	0.320	No	10.1143/APEX.5.041801
Na	Ni	Fe	0.720	0.320	No	﻿10.1155/2013/967285
Na	Ni	Fe	0.720	0.320	No	﻿10.1038/s41598-021-83699-8
Na	Ni	Fe	0.420	0.328	No	﻿10.1149/2.0861809jes
Na	Ni	Fe	0.680	0.330	No	﻿10.1039/c4cc04564e
Na	NiCo	Fe	1.680	0.160	Yes	﻿10.1002/aenm.201702856
Na	NiCo	Fe	0.710	0.250	No	﻿10.1002/aenm.201702856
Na	Ti	Fe	0.660	0.080	No	﻿10.1016/j.jpowsour.2015.10.042
Na	Ti	Fe	0.700	0.100	No	﻿10.1016/j.jpowsour.2015.10.042
Na	V	Fe	0.485	0.231	No	﻿10.1016/j.jpowsour.2020.229263
Na	Mn	Mn	1.070	0.010	Yes	﻿10.1038/ncomms6280
Na	Mn	Mn	1.960	0.010	Yes	﻿10.1038/ncomms6280
Na	Mn	Mn	2.040	0.010	Yes	﻿10.1038/ncomms6280
Na	Mn	Mn	3.000	0.010	Yes	﻿10.1038/ncomms6280
NaK	Cu	Fe	0.073	0.333	No	10.1016/0039-9140(95)01611-2
NaK	Cu	Fe	0.067	0.522	No	10.1016/0039-9140(95)01611-2
NaK	Mn	Fe	1.680	0.150	Yes	﻿10.1002/cssc.202002628
NaK	Ni	Fe	0.480	0.170	No	﻿10.1002/cssc.202002339
NaK	Ni	Fe	0.640	0.200	No	10.1021/acsami.0c08084
NaK	Ni	Fe	0.340	0.240	No	﻿10.1002/cssc.202002339
NaK	Ni	Fe	0.360	0.280	No	10.1021/acs.jpcc.1c08284
NaK	Ni	Fe	0.220	0.290	No	﻿10.1039/c3ta13223d
NaK	Ni	Fe	0.420	0.290	No	﻿10.1039/c3ta13223d
NaK	Ni	Fe	0.470	0.290	No	﻿10.1039/c3ta13223d
NaK	Ni	Fe	0.720	0.290	No	﻿10.1039/c3ta13223d
NaK	Ni	Fe	0.770	0.290	No	﻿10.1039/c3ta13223d
NaK	Ni	Fe	0.890	0.290	No	﻿10.1039/c3ta13223d
NaK	Ni	Fe	0.050	0.290	No	10.1021/acs.jpcc.1c08284
NaK	Ni	Fe	0.220	0.290	No	﻿10.1002/cssc.202002339
NaK	Ni	Fe	0.120	0.350	No	10.1021/acsami.0c08084
K	Cd	Co	0.100	0.250	No	10.1021/jacs.0c13181
K	Co	Co	0.290	0.237	No	﻿10.1002/chem.201704933
K	Cu	Co	0.143	0.286	No	﻿10.1007/s10008-004-0635-5
K	Cu	Co	0.046	0.302	No	﻿10.3390/catal9110905
K	Cu	Co	0.010	0.360	No	10.1021/acs.jpcc.8b03015
K	Mn	Co	0.060	0.240	No	10.1021/jacs.0c13181
K	Mn	Co	0.074	0.250	No	﻿10.3390/catal9110905
K	Mn	Co	0.040	0.300	No	10.1021/acs.jpcc.8b03015
K	Co	Cr	0.317	0.228	No	﻿10.1002/chem.201704933
K	Fe	Cr	0.687	0.077	No	﻿10.1002/ejic.200900902
K	Fe	Cr	0.450	0.200	No	﻿10.1021/ic302764k
K	Fe	Cr	0.350	0.225	No	﻿10.1021/ic302764k
K	Fe	Cr	0.275	0.250	No	﻿10.1021/ic302764k
K	Fe	Cr	0.200	0.275	No	﻿10.1021/ic302764k
K	Fe	Cr	0.100	0.300	No	﻿10.1021/ja8047046
K	Fe	Cr	0.125	0.300	No	﻿10.1021/ic302764k
K	Fe	Cr	0.050	0.325	No	﻿10.1021/ic302764k
K	Fe	Cr	0.050	0.350	No	﻿10.1021/ic302764k
K	Mn	Cr	0.720	0.047	No	﻿10.1002/ejic.200900902
K	Mn	Cr	0.143	0.286	No	﻿10.1021/ic051145f
K	Ni	Cr	0.420	0.120	No	10.1103/PhysRevB.91.094104
K	V	Cr	1.000	0.000	No	﻿10.1021/ja990946c
K	Zn	Cr	0.591	0.207	No	﻿10.1002/ejic.200900902
K	Co	CrFe	0.262	0.150	No	﻿10.1021/ic202571d
K	Co	CrFe	0.250	0.156	No	﻿10.1021/ic202571d
K	Co	CrFe	0.264	0.188	No	﻿10.1021/ic202571d
K	Co	Fe	1.846	0.038	No	﻿10.1039/c8nj00451j
K	Co	Fe	1.810	0.048	No	﻿10.1021/ja406242y
K	Co	Fe	1.774	0.057	No	﻿10.1021/ja406242y
K	Co	Fe	1.430	0.060	No	﻿10.1039/d0ta06979e
K	Co	Fe	1.535	0.123	No	﻿10.1021/ja406242y
K	Co	Fe	0.300	0.230	No	10.1103/PhysRevB.84.144102
K	Co	Fe	0.340	0.250	No	﻿10.1103/PhysRevB.79.132105
K	Co	Fe	0.250	0.252	No	﻿10.1021/ic202571d
K	Co	Fe	0.230	0.257	No	﻿10.1002/chem.201704933
K	Co	Fe	0.270	0.270	No	10.1103/PhysRevB.86.054431
K	Co	Fe	0.143	0.286	No	10.1126/science.272.5262.704
K	Co	Fe	0.034	0.310	No	10.1021/acs.inorgchem.1c03531
K	Co	Fe	0.025	0.325	No	﻿10.1021/ja000348u
K	Co	Fe	0.025	0.325	No	﻿10.1021/ja011296r
K	Co	Fe	0.025	0.325	No	10.1021/jp0340313
K	Co	Fe	0.100	0.333	No	﻿10.1002/aenm.201800085
K	Co	Fe	0.424	0.394	No	﻿10.1002/chem.201704933
K	CoNi	Fe	0.292	0.228	No	﻿10.1021/ic202571d
K	CoNi	Fe	0.240	0.231	No	﻿10.1021/ic202571d
K	CoNi	Fe	0.312	0.239	No	﻿10.1021/ic202571d
K	CoNi	Fe	0.304	0.244	No	﻿10.1021/ic202571d
K	Cu	Fe	1.960	0.020	Yes	10.26434/chemrxiv-2022-zr5nn
K	Cu	Fe	0.117	0.167	No	10.1016/0039-9140(95)01611-2
K	Cu	Fe	1.510	0.210	No	﻿10.1098/rsos.201779
K	Cu	Fe	0.414	0.219	No	10.1016/0039-9140(95)01611-2
K	Cu	Fe	1.250	0.219	No	﻿10.1007/s10973-020-09823-4
K	Cu	Fe	0.692	0.231	No	﻿10.1149/2.060202jes
K	Cu	Fe	1.000	0.250	No	﻿10.1039/c8ra06377j
K	Cu	Fe	1.100	0.250	No	﻿10.3390/ma12203371
K	Cu	Fe	0.206	0.265	No	﻿10.1039/c5cc00362h
K	Cu	Fe	1.100	0.270	No	﻿10.1098/rsos.201779
K	Cu	Fe	0.710	0.280	No	﻿10.1038/ncomms1563
K	Cu	Fe	0.860	0.280	No	﻿10.1098/rsos.201779
K	Cu	Fe	0.029	0.281	No	10.1016/0039-9140(95)01611-2
K	Cu	Fe	0.078	0.291	No	10.1016/0039-9140(95)01611-2
K	Cu	Fe	0.770	0.300	No	﻿10.1039/c8ra06377j
K	Cu	Fe	0.021	0.301	No	10.1016/0039-9140(95)01611-2
K	Cu	Fe	0.098	0.301	No	﻿10.1002/anie.201102048
K	Cu	Fe	0.180	0.310	No	﻿10.1098/rsos.201779
K	Cu	Fe	0.240	0.310	No	﻿10.1098/rsos.201779
K	Cu	Fe	0.048	0.315	No	10.1016/0039-9140(95)01611-2
K	Cu	Fe	0.619	0.320	No	﻿10.1039/c7ta04172a
K	Cu	Fe	0.090	0.320	No	﻿10.1021/acs.cgd.6b01684
K	Cu	Fe	0.100	0.320	No	﻿10.1098/rsos.201779
K	Cu	Fe	0.910	0.320	No	﻿10.1021/acs.cgd.6b01684
K	Cu	Fe	0.050	0.330	No	﻿10.1038/ncomms4007
K	Cu	Fe	0.060	0.330	No	﻿10.1021/acs.inorgchem.6b00227
K	Cu	Fe	0.060	0.330	No	﻿10.3390/ma12203371
K	Cu	Fe	0.700	0.330	No	﻿10.1039/c8ra06377j
K	Cu	Fe	0.046	0.338	No	10.1016/0039-9140(95)01611-2
K	Cu	Fe	0.042	0.339	No	﻿10.1002/chem.201905384
K	Cu	Fe	0.250	0.350	No	﻿10.1021/acs.inorgchem.6b00227
K	Cu	Fe	0.380	0.350	No	﻿10.1021/acs.inorgchem.6b00227
K	Cu	Fe	0.520	0.360	No	﻿10.1021/acs.inorgchem.6b00227
K	Cu	Fe	0.610	0.360	No	﻿10.1021/acs.inorgchem.6b00227
K	Cu	Fe	0.610	0.360	No	﻿10.3390/ma12203371
K	Cu	Fe	0.070	0.370	No	﻿10.1021/acs.inorgchem.6b00227
K	Cu	Fe	0.470	0.380	No	﻿10.1039/c8ra06377j
K	Cu	Fe	0.494	0.398	No	﻿10.1007/s10973-020-09823-4
K	Cu	Fe	0.030	0.400	No	﻿10.3390/ma12203371
K	Cu	Fe	0.330	0.410	No	﻿10.1039/c8ra06377j
K	Cu	Fe	0.190	0.430	No	﻿10.1039/c8ra06377j
K	Cu	Fe	0.179	0.474	No	﻿10.1007/s10973-020-09823-4
K	Cu	Fe	0.050	0.480	No	﻿10.1039/c8ra06377j
K	Cu	Fe	0.173	0.490	No	﻿10.1021/acs.jpcc.8b03429
K	Cu	Fe	0.230	0.510	No	﻿10.1098/rsos.201779
K	Fe	Fe	1.780	0.080	Yes	10.1021/acsenergylett.7b00179
K	Fe	Fe	1.529	0.083	No	﻿10.1016/j.elecom.2017.02.012
K	Fe	Fe	1.820	0.090	Yes	1﻿0.1021/acs.cgd.8b00239
K	Fe	Fe	1.690	0.100	Yes	10.1021/acsenergylett.7b00179
K	Fe	Fe	0.680	0.110	No	10.1021/acsenergylett.7b00179
K	Fe	Fe	1.020	0.120	Yes	1﻿0.1021/acs.cgd.8b00239
K	Fe	Fe	0.980	0.140	No	1﻿0.1021/acs.cgd.8b00239
K	Fe	Fe	0.950	0.180	No	1﻿0.1021/acs.cgd.8b00239
K	Fe	Fe	1.810	0.180	No	10.1021/acsnano.0c02047
K	Fe	Fe	0.220	0.195	No	﻿10.1002/adfm.201604307
K	Fe	Fe	0.475	0.250	No	﻿10.1021/jp3111327
K	Fe	Fe	0.850	0.360	No	1﻿0.1021/acs.cgd.8b00239
K	FeNi	Fe	1.900	0.110	No	10.1021/acsnano.0c02047
K	Mn	Fe	1.940	0.000	Yes	﻿10.1002/cssc.202002628
K	Mn	Fe	1.940	0.006	Yes	﻿10.1038/s41467-021-22499-0
K	Mn	Fe	1.840	0.010	Yes	﻿10.1002/cssc.202002628
K	Mn	Fe	2.000	0.018	Yes	﻿10.1039/d1cc03698j
K	Mn	Fe	1.890	0.020	Yes	﻿10.1021/acs.chemmater.0c01347
K	Mn	Fe	1.860	0.030	Yes	﻿10.1098/rsos.201779
K	Mn	Fe	1.910	0.030	Yes	﻿10.1021/acs.chemmater.0c01347
K	Mn	Fe	1.600	0.040	Yes	﻿10.1002/celc.201700410
K	Mn	Fe	0.942	0.041	Yes	﻿10.1016/j.apsusc.2018.03.102
K	Mn	Fe	1.920	0.050	Yes	﻿10.1021/acs.chemmater.0c01347
K	Mn	Fe	1.700	0.060	Yes	﻿10.1002/adma.202106876
K	Mn	Fe	1.850	0.060	Yes	﻿10.1002/smll.201902420
K	Mn	Fe	1.860	0.060	Yes	﻿10.1021/acs.chemmater.0c01347
K	Mn	Fe	1.990	0.060	Yes	﻿10.1038/s41560-019-0388-0
K	Mn	Fe	1.750	0.070	Yes	﻿10.1039/c7ta00220c
K	Mn	Fe	1.720	0.080	Yes	﻿10.1038/s41467-021-22499-0
K	Mn	Fe	1.640	0.110	Yes	﻿10.1039/c7ta00220c
K	Mn	Fe	1.520	0.130	Yes	﻿10.1002/smll.201902420
K	Mn	Fe	0.100	0.300	No	﻿10.1039/C8DT01687A
K	Mn	Fe	0.098	0.301	No	﻿10.1021/jz100708b
K	Mn	Fe	0.039	0.324	No	﻿10.1016/j.apsusc.2018.03.102
K	Mn	Fe	0.095	0.524	No	﻿10.1016/j.jmmm.2005.09.004
K	MnFe	Fe	1.850	0.020	Yes	﻿10.1038/s41560-019-0388-0
K	Ni	Fe	1.438	0.048	No	﻿10.1016/j.elecom.2017.02.012
K	Ni	Fe	1.840	0.120	No	﻿10.1002/anie.202103475
K	Ni	Fe	0.500	0.167	No	﻿10.1021/nl203193q
K	Ni	Fe	0.500	0.167	No	﻿10.1149/2.060202jes
K	Ni	Fe	0.170	0.190	No	10.3390/nano11102756
K	Ni	Fe	0.325	0.225	No	﻿10.1039/c4ra03296a
K	Ni	Fe	0.362	0.254	No	﻿10.1016/S0921-5107(97)00118-9
K	Ni	Fe	0.212	0.258	No	﻿10.1021/ic202571d
K	Ni	Fe	0.046	0.288	No	﻿10.1016/S0921-5107(97)00118-9
K	Ni	Fe	0.090	0.290	No	﻿10.1039/c3ta13223d
K	Ni	Fe	0.025	0.298	No	﻿10.1016/S0921-5107(97)00118-9
K	Ni	Fe	0.028	0.301	No	﻿10.1016/S0921-5107(97)00118-9
K	Ni	Fe	0.050	0.310	No	﻿10.1002/cssc.202002339
K	Ni	Fe	0.014	0.310	No	﻿10.1002/cssc.201903067
K	Ni	Fe	0.027	0.324	No	﻿10.1002/cssc.201402084
K	Ni	Fe	0.040	0.330	No	10.1021/acsami.6b11070
K	Ni	Fe	0.554	0.363	No	﻿10.1080/18811248.1997.9733711
K	NiCu	Fe	1.000	0.000	No	﻿10.1021/ic0201654
K	NiZn	Fe	0.029	0.275	No	﻿10.1002/cssc.201402084
K	NiZn	Fe	0.070	0.296	No	﻿10.1002/cssc.201402084
K	NiZn	Fe	0.055	0.310	No	﻿10.1002/cssc.201402084
K	Ti	Fe	0.778	0.074	No	﻿10.1016/j.cej.2019.123713
K	Ti	Fe	0.299	0.390	No	﻿10.1016/j.cej.2019.123713
K	Mn	Mn	1.980	0.000	Yes	﻿10.1021/acs.jpcc.9b06338
K	Mn	Mn	0.600	0.070	No	﻿10.1021/jp2118949
K	Mn	Mn	0.900	0.070	No	﻿10.1021/jp2118949
K	Mn	Mn	1.100	0.070	No	﻿10.1021/jp2118949
K	Mn	Mn	1.720	0.070	Yes	﻿10.1021/jp2118949
K	Mn	Mn	0.110	0.170	No	﻿10.1038/ncomms4007
KCs	Cu	Fe	0.700	0.330	No	﻿10.1039/c8ra06377j
Rb	Co	Co	0.500	0.175	No	﻿10.1016/j.ica.2008.03.029
Rb	Cu	Co	0.900	0.080	Yes	﻿10.1039/c9cc05436g
Rb	Mn	Co	0.870	0.090	No	10.1021/jacs.0c13181
Rb	Ni	Cr	0.160	0.250	No	﻿10.1063/5.0049223
Rb	Cd	Fe	0.640	0.120	No	10.1143/JPSJ.80.024603
Rb	Co	Fe	0.600	0.150	No	﻿10.1063/5.0049223
Rb	Co	Fe	0.450	0.175	No	﻿10.1021/ja000348u
Rb	Co	Fe	0.500	0.175	No	﻿10.1016/j.ica.2008.03.029
Rb	Co	Fe	0.500	0.175	No	﻿10.1021/acs.inorgchem.8b00508
Rb	Co	Fe	0.515	0.177	No	﻿10.1021/ja102660b
Rb	Co	Fe	0.490	0.200	No	﻿10.1103/PhysRevB.79.172302
Rb	CoZn	Fe	0.500	0.150	No	﻿10.1016/j.ica.2008.03.029
Rb	CoZn	Fe	0.500	0.175	No	﻿10.1016/j.ica.2008.03.029
Rb	CoZn	Fe	0.525	0.200	No	﻿10.1016/j.ica.2008.03.029
Rb	Cu	Fe	0.850	0.050	Yes	﻿10.1039/c2dt12296k
Rb	Cu	Fe	0.710	0.200	No	﻿10.3390/ma12203371
Rb	Fe	Fe	0.780	0.170	No	﻿10.1103/PhysRevB.79.172302
Rb	Mn	Fe	1.000	0.000	No	﻿10.1016/j.jmmm.2006.10.429
Rb	Mn	Fe	0.970	0.010	No	﻿10.1103/PhysRevB.68.144106
Rb	Mn	Fe	0.970	0.010	No	﻿10.1021/cm203762k
Rb	Mn	Fe	0.940	0.020	No	﻿10.1021/cm048461x
Rb	Mn	Fe	0.940	0.020	No	﻿10.1021/jp8021216
Rb	Mn	Fe	0.970	0.020	No	﻿10.1021/cm052521x
Rb	Mn	Fe	0.910	0.030	No	﻿10.1021/jp8021216
Rb	Mn	Fe	0.870	0.040	No	10.1021/acs.inorgchem.1c03826
Rb	Mn	Fe	0.880	0.040	No	﻿10.1021/cm701873s
Rb	Mn	Fe	0.880	0.040	No	﻿10.1021/jp8021216
Rb	Mn	Fe	0.890	0.040	No	10.1021/acs.inorgchem.1c03826
Rb	Mn	Fe	0.900	0.040	No	10.1021/acs.inorgchem.1c03826
Rb	Mn	Fe	0.867	0.048	No	﻿10.1016/j.ccr.2004.11.015
Rb	Mn	Fe	0.810	0.050	No	﻿10.1021/cm052521x
Rb	Mn	Fe	0.850	0.050	No	﻿10.1021/cm048461x
Rb	Mn	Fe	0.860	0.050	No	10.1021/acs.inorgchem.1c03826
Rb	Mn	Fe	0.920	0.050	No	﻿10.1021/cm052521x
Rb	Mn	Fe	0.977	0.053	No	﻿10.1021/jp0133687
Rb	Mn	Fe	0.978	0.053	No	﻿10.1021/ic030332f
Rb	Mn	Fe	0.820	0.060	No	﻿10.1002/anie.200604452
Rb	Mn	Fe	0.820	0.060	No	10.1021/acs.inorgchem.1c03826
Rb	Mn	Fe	0.820	0.060	No	10.1021/acs.inorgchem.1c03826
Rb	Mn	Fe	0.820	0.060	No	﻿10.1021/jp8021216
Rb	Mn	Fe	0.830	0.060	No	10.1021/acs.inorgchem.1c03826
Rb	Mn	Fe	0.790	0.070	No	﻿10.1021/jp8021216
Rb	Mn	Fe	0.750	0.080	No	10.1021/acs.inorgchem.1c03826
Rb	Mn	Fe	0.760	0.080	No	﻿10.1021/jp8021216
Rb	Mn	Fe	0.770	0.080	No	10.1021/acs.inorgchem.1c03826
Rb	Mn	Fe	0.730	0.090	No	﻿10.1021/cm048461x
Rb	Mn	Fe	0.730	0.090	No	﻿10.1021/jp8021216
Rb	Mn	Fe	0.670	0.110	No	10.1021/acs.inorgchem.1c03826
Rb	Mn	Fe	0.670	0.110	No	﻿10.1021/jp8021216
Rb	Mn	Fe	0.640	0.120	No	﻿10.1021/jp8021216
Rb	Mn	Fe	0.610	0.130	No	10.1021/acs.inorgchem.1c03826
Rb	Mn	Fe	0.610	0.130	No	﻿10.1021/jp8021216
Rb	Mn	Fe	0.610	0.130	No	﻿10.1002/zaac.200700129
Rb	Mn	Fe	0.609	0.130	No	﻿10.1002/anie.200460603
Rb	Mn	Fe	0.609	0.130	No	﻿10.1021/jz100708b
Rb	Mn	Fe	0.580	0.140	No	﻿10.1021/cm701873s
Rb	Mn	Fe	0.580	0.140	No	﻿10.1021/jp8021216
Rb	Mn	Fe	0.590	0.140	No	﻿10.1021/cm052521x
Rb	Mn	Fe	0.550	0.150	No	10.1021/acs.inorgchem.1c03826
Rb	Mn	Fe	0.500	0.160	No	﻿10.1039/C8DT01687A
Rb	Mn	Fe	0.400	0.200	No	﻿10.1021/cm302995w
Rb	MnNi	Fe	0.542	0.153	No	﻿10.1021/ja061514m
Rb	Ni	Fe	0.550	0.150	No	﻿10.1021/jp403337w
Rb	Ni	Fe	0.460	0.180	No	﻿10.1103/PhysRevB.79.172302
Rb	Ni	Fe	0.460	0.180	No	10.1143/JPSJ.80.024603
Rb	Zn	Fe	0.850	0.050	No	10.1143/JPSJ.80.024603
Rb	Zn	Fe	0.640	0.120	No	﻿10.1103/PhysRevB.79.172302
Rb	Zn	Fe	0.640	0.120	No	10.1143/JPSJ.80.024603
Rb	Zn	Fe	0.475	0.200	No	﻿10.1016/j.ica.2008.03.029
Rb	Co	FeCo	0.525	0.175	No	﻿10.1016/j.ica.2008.03.029
Rb	Co	FeCo	0.550	0.175	No	﻿10.1016/j.ica.2008.03.029
Cs	Co	Co	1.625	0.275	No	﻿10.1016/j.ica.2008.03.029
Cs	Mn	Co	1.000	0.000	No	10.1021/jacs.0c13181
Cs	Ni	Cr	0.850	0.050	No	10.1021/acs.inorgchem.1c02237
Cs	Ni	Cr	0.960	0.060	No	﻿10.1039/d0nr06971j
Cs	V	Cr	0.820	0.060	No	﻿10.1021/ja990946c
Cs	Cd	Fe	1.000	0.000	No	﻿10.1103/PhysRevB.79.172302
Cs	Cd	Fe	1.000	0.000	No	10.1143/JPSJ.80.024603
Cs	Co	Fe	0.975	0.025	No	10.1021/jp0340313
Cs	Co	Fe	0.975	0.025	No	﻿10.1021/ja000348u
Cs	Co	Fe	0.975	0.025	No	﻿10.1021/ja011296r
Cs	Co	Fe	1.800	0.050	No	﻿10.1021/acs.inorgchem.0c01432
Cs	Co	Fe	0.700	0.100	No	﻿10.1039/d0nr06971j
Cs	Co	Fe	0.700	0.100	No	﻿10.1021/acs.inorgchem.0c01432
Cs	Co	Fe	0.575	0.150	No	﻿10.1021/ja011296r
Cs	Co	Fe	0.575	0.150	No	10.1021/jp0340313
Cs	Co	Fe	0.910	0.160	No	﻿10.1103/PhysRevB.79.172302
Cs	Co	Fe	0.500	0.174	No	﻿10.1021/ja102660b
Cs	Co	Fe	0.300	0.200	No	﻿10.1021/ja011296r
Cs	Co	Fe	0.325	0.200	No	10.1021/jp0340313
Cs	Co	Fe	0.175	0.275	No	﻿10.1021/ja011296r
Cs	Co	Fe	0.175	0.275	No	10.1021/jp0340313
Cs	Co	Fe	0.075	0.300	No	﻿10.1021/ja011296r
Cs	Co	Fe	0.075	0.300	No	10.1021/jp0340313
Cs	Co	Fe	0.175	0.300	No	﻿10.1016/j.ica.2008.03.029
Cs	CoZn	Fe	0.175	0.275	No	﻿10.1016/j.ica.2008.03.029
Cs	CoZn	Fe	0.163	0.300	No	﻿10.1016/j.ica.2008.03.029
Cs	Cu	Fe	0.900	0.000	No	﻿10.3390/ma12203371
Cs	Cu	Fe	0.970	0.010	No	﻿10.1103/PhysRevB.79.172302
Cs	Cu	Fe	0.970	0.010	No	﻿10.1039/c2dt12296k
Cs	Cu	Fe	0.650	0.310	No	﻿10.3390/ma12203371
Cs	Cu	Fe	0.150	0.520	No	﻿10.1039/c8ra06377j
Cs	Fe	Fe	0.980	0.100	No	﻿10.1103/PhysRevB.79.172302
Cs	Mn	Fe	1.510	0.000	No	﻿10.1039/b605269j
Cs	Mn	Fe	1.570	0.000	No	﻿10.1039/b605269j
Cs	Mn	Fe	1.780	0.000	No	﻿10.1039/b605269j
Cs	Mn	Fe	1.200	0.070	No	﻿10.1039/C8DT01687A
Cs	Mn	Fe	0.940	0.090	No	﻿10.1039/b605269j
Cs	Ni	Fe	0.700	0.100	No	﻿10.1103/PhysRevB.79.172302
Cs	Ni	Fe	0.700	0.100	No	10.1143/JPSJ.80.024603
Cs	Ni	Fe	0.525	0.175	No	﻿10.1021/jp403337w
Cs	Ni	Fe	0.258	0.248	No	﻿10.1021/jp403337w
Cs	Zn	Fe	0.910	0.030	No	﻿10.1103/PhysRevB.79.172302
Cs	Zn	Fe	0.910	0.030	No	10.1143/JPSJ.80.024603
Cs	Zn	Fe	0.640	0.120	No	10.1143/JPSJ.80.024603
Cs	Zn	Fe	0.175	0.300	No	﻿10.1016/j.ica.2008.03.029
Cs	Co	FeCo	0.163	0.275	No	﻿10.1016/j.ica.2008.03.029
Cs	Co	FeCo	0.175	0.275	No	﻿10.1016/j.ica.2008.03.029
